# Supplementary material
Source: Research Square preprint supplement (doi:10.21203/rs.3.rs-9021786/v1)
Supplement: Supplementary file 1 [file a6a698e190f187cc57b0c9f7.docx]

**AHSG confers apoptosis resistance in lung adenocarcinoma by modulating the GSK3β/β-catenin axis**

Moyna Kalia1, Akanksha Kapoor1, Deeksha Pal2, Suman Dasgupta3, Durba Pal1*

1Department of Biomedical Engineering, Indian Institute of Technology Ropar, Rupnagar-140001, Punjab, India

2Department of Urology, Post Graduate Institute of Medical Education and Research (PGIMER),160012, Chandigarh, India

3Department of Molecular Biology and Biotechnology, Tezpur University, Assam, 784028, India

*Corresponding Author Address

Durba Pal, PhD

Department of Biomedical Engineering,

Indian Institute of Technology Ropar,

Rupnagar-140001, Punjab, India

E-mail- [durba.pal@iitrpr.ac.in](mailto:durba.pal@iitrpr.ac.in)

Phone- (+91) 01881-23-506

Supplementary tables:

Supplementary Table 1: KEY RESOURCES

| **REAGENT OR RESOURCE** | **SOURCE** | **IDENTIFIER** |
| --- | --- | --- |
| **Antibodies** |  |  |
| anti-Ki-67 | Thermo fisher scientific | Cat# MA5-14520 |
| anti-GSK3β | Novus Biologicals | Cat# NBP1-47470SS |
| anti-β-catenin | Santa Cruz | Cat# SC7963 |
| anti-pGSK3β | Abcam | Cat# 182422 |
| Anti-cMyc | CloudClone | Cat#A19032 |
| anti-cyclin D1 | CloudClone | Cat# PAA585HU01 |
| anti-AHSG | Santa Cruz | Cat# SC166531 |
| anti-caspase 8 | Cell Signaling Technology | Cat# 9746 |
| anti-capase 9 | BioBharti | Cat# BB-AB0245 |
| anti-caspase 3 | BioBharti | Cat# BB-AB0243 |
| anti-cleaved caspase 3 | Cell Signaling Technology | Cat# 9661T |
| anti-BAX | Santa Cruz | Cat# SC7480 |
| anti-BCL 2 | Santa Cruz | Cat# SC7382 |
| anti-ubiquitin | Cell Signaling Technology | Cat# 3936T |
| anti-AKT | Cell Signaling Technology | Cat# 9272 |
| anti-Mouse IgG Alexa fluor 488 | Cell Signaling Technology | Cat# 4408 |
| anti-Rabbit IgG Alexa fluor 594 | Cell Signaling Technology | Cat# 8889 |
| HRP conjugated Anti-Mouse IgG antibody | Sigma-Aldrich | Cat# 8889 |
| HRP conjugated Anti-Rat IgG antibody | Sigma-Aldrich | Cat# AP136P |
| HRP conjugated Anti-Rabbit IgG antibody | Sigma-Aldrich | Cat# A9169 |
|  |  |  |
|  |  |  |
| **Chemicals** |  |  |
| DMEM | Gibco | Cat# 11995073 |
| RPMI 1640 | Gibco | Cat# 11875093 |
| LHC-9 media | Gibco | Cat# 12680013 |
| FBS | Gibco | Cat# 10082147 |
| Penicillin/Streptomycin | Gibco | Cat# 15140122 |
| DPBS | Gibco | Cat# 14190-144 |
| Trypsin 0.25% EDTA | Gibco | Cat# 25200072 |
| Lipofectamine LTX reagent with PLUS reagent | Invitrogen | Cat. no. #15338100 |
| Dexamethasone | Sigma-Aldrich | Cat# D1756 |
| MG-132 | Sigma | Cat# 474790 |
| Calcein-AM | Thermo fisher scientific | Cat# C3099 |
| Propidium iodide | Thermo fisher scientific | Cat# P1304MP |
| DAPI | Thermo fisher scientific | Cat# D1306 |
| Trizol reagent | Invitrogen | Cat# 15596018 |
| C25-140 | Med Chem | Cat# HY-120934 |
| iScript cDNA synthesis kit | BIO-RAD | Cat# 1708891 |
| ClarityTM Western ECL Substrate | Bio-Rad | Cat# 1705061 |
| Universal SYBR Green Supermix | BIO-RAD | Cat# 172-5124 |
| PVDF membranes | Bio-Rad | Cat# 1620177 |
| Tissue Freezing Medium | Leica Biosystems | Cat#14020108926 |
| Cycloheximide | Sigma | Cat# 239763 |
| SuperScript VILO cDNA synthesis kit | Thermo Fisher Scientific | Cat# 11754-050 |
| Crystal violet stain | Sigma | Cat# C6158 |
| Protein G Magnetic beads | BIO-RAD | Cat# 161-4023 |
| 16% Formaldehyde Solution | Thermo fisher scientific | Cat# 28906 |
| Tissue freezing medium | Leica | 14020108926 |
| Triton X-100 | Sigma | Cat# T8787 |
| Ethanol | Merck | 1009832500 |
| Isopropanol | Himedia | Cat# MB063 |
| MTT | Sigma | Cat# M5655 |
| Acetone | Merck | Cat# SD7F670190 |
| Chloroform | SRL | Cat# 84155 |
| Methanol | Merck | Cat# SGOP700408 |
| BSA | Sigma | Cat# A2153 |
| PMA | Sigma | Cat# P8139 |
| Apoptosis detection kit | BD | Cat# 556547 |
| EpiQuick Nuclear Extraction Kit I | EpigenTek | Cat# OP-0002 |
| DPX Mountant | SRL | Cat# 88147 |
| Control ASO (Scramble) | IDT |  |
| Fetuin-A ASO | IDT |  |
| AHSG Bio-His overexpression plasmid | Addgene | Cat# 52175 |
| AHSG recombinant | Abcam | Cat# ab151889 |

Supplementary Table 2:

| **Clinicopathological features** |  |  |
| --- | --- | --- |
| **LUAD patients** |  |  |
| Number of patients | 5 |  |
| Age (median range) | 50 years (38-75 years) |  |
| Gender | 2 (Male) |  |
|  | 3 (Female) |  |
| Smoking history | 1 (Smoker) |  |
|  | 4 (Non-smoker) |  |
| Histological subtype | Lung adenocarcinoma |  |
| TNM staging | Stage 1-2 (Primary Tumor) |  |
| **Non-cancerous patients** |  | **Disease category** |
| Number of patients | 5 | Tuberculosis, Granulomatous inflammation |
| Age (median range) | 54 years (24-75 years) |  |
| Gender | 2 (Male) |  |
|  | 3 (Female) |  |
| Smoking history | 1 (Smoker) |  |
|  | 4 (Non-smoker) |  |

Supplementary Table 3:

| **Gene name** | **Forward primer (5'-3')** | **Reverse primer (5'-3')** |
| --- | --- | --- |
| *AHSG* | AGATTGATGAAGTAAAGGTGTGGC | CTTCGACAGCATGCTCCTTC |
| *18S* | GGACCAGAGCGAAAGCATTTGCC | TGTTGGCGACAGACCGGTTCAAATC |
| *TRAF6* | GCACGCCACCTACAAGAGAA | TCAGCTCCCGGATTTGATGG |
| *BAX* | TCTGACGGCAACTTCAACTG | AGTCCAATGTCCAGCCCATG |
